# Supplementary material for: Flower-like Ag coated with molecularly imprinted polymers as a surface-enhanced Raman scattering substrate for the sensitive and selective detection of glibenclamide
Source: Royal Society of Chemistry journal article supplement (doi:10.1039/d0ay00575d), 2020-01-01
Supplement: d0ay00575d1.pdf [file d0ay00575d1.pdf]

1 A flower-like Ag coated with molecularly imprinted polymers as surface-enhanced  
2 Raman scattering substrate for sensitive and selective detection of glibenclamide

3

4 Xiaohui Ren<sup>a</sup>, Xin Li<sup>a,\*</sup>

5

6 *<sup>a</sup> MIIT Key Laboratory of Critical Materials Technology for New Energy Conversion*  
7 *and Storage, School of Chemistry and Chemical Engineering, State Key Lab of Urban*  
8 *Water Resource and Environment, Harbin Institute of Technology, Harbin 150090,*

9 *China*

10

11

12

13

14

15

16

17

18

19

20

21

22

23

#### 24 **Application to real sample analysis**

25 The tap water was selected to evaluate the practical application of flower-like  
26 Ag@MIPs. Table S1 shown the relevant parameters of tap water. The flower-like  
27 Ag@MIPs used as the SERS substrate for the Raman detection after added a certain  
28 amount of glibenclamide into the tap water, and the result was shown in Fig. S1. The  
29 Raman characteristic peaks of glibenclamide was obtained, which shown that this  
30 method has the potential for practical application.

31

32

33

34

35

36

37

38

39

40

41

42

43

44

45

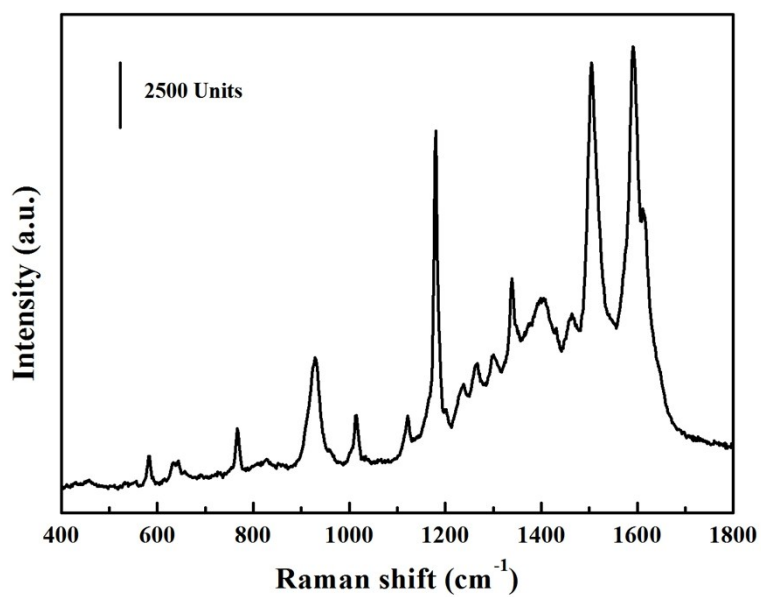

46

47

**Fig. S1** The SERS spectrum of tap water sample.

48

49

50

51

52

53

54

55

56

57

58

59

60

61

62

Table S1 The parameter of the tap water.

| Parameter | Value     |
|-----------|-----------|
| turbidity | 0.31      |
| TOC       | 2.44 mg/L |
| pH        | 6.8       |

63
